# Supplementary material for: Analysis of the Pancreatic Cancer Microbiome Using Endoscopic Ultrasound–Guided Fine-Needle Aspiration–Derived Samples
Source: PubMed Central journal article supplement — Pancreas. 2022 Jun 12;51(4):351–7. doi: 10.1097/MPA.0000000000002028 (PMC9257056; doi:10.1097/mpa.0000000000002028), 2022-06-12
Supplement: pancreas-51-351-s001.pdf [file pancreas-51-351-s001.pdf]

# Analysis of the Pancreatic Cancer Microbiome Using Endoscopic Ultrasound-Guided Fine-Needle Aspiration-Derived Samples

## SUPPLEMENTAL DIGITAL CONTENT

### Unweighted UniFrac distance

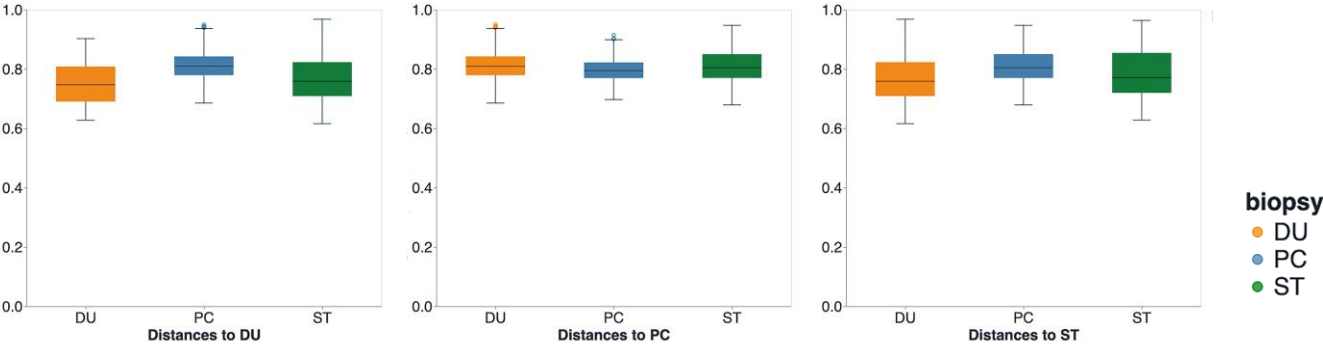

A

### Weighted UniFrac distance

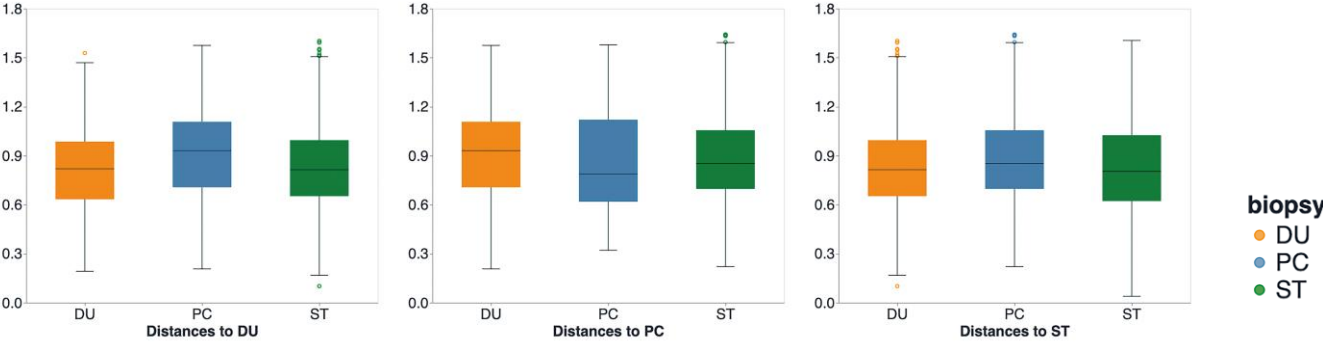

B

**SUPPLEMENTAL FIGURE 1.** Beta diversity among pancreatic cancer (PC), stomach (ST), and duodenum (DU) tissues. A, Unweighted UniFrac distance. B, Weighted UniFrac distance.
